# Supplementary material
Source: PubMed Central journal article supplement (PMC2819028)
Supplement: NIHMS169078-supplement-1_si_001.pdf [file NIHMS169078-supplement-1_si_001.pdf]

## The Structural Basis of *Cryptosporidium*-Specific IMP Dehydrogenase Inhibitor Selectivity

Iain S. MacPherson<sup>†</sup>, Sivapriya Kirubakaran<sup>†</sup>, Suresh Kumar Gorla<sup>†</sup>, Thomas V. Riera<sup>‡</sup>,  
J. Alejandro D'Aquino<sup>‡</sup>, Minjia Zhang<sup>†</sup>, Gregory D. Cuny<sup>§</sup> and Lizbeth Hedstrom<sup>†¶\*</sup>

*Departments of <sup>†</sup>Biology, <sup>‡</sup>Biochemistry and <sup>¶</sup>Chemistry, Brandeis University, MS009,  
415 South St. Waltham, MA 02454; <sup>§</sup>Laboratory for Drug Discovery in  
Neurodegeneration, Brigham & Women's Hospital, Harvard Medical School, 65  
Landsdowne Street, Cambridge, MA 02139*

### Supporting Information

#### *Complete References*

- (4) Abrahamsen, M. S.; Templeton, T. J.; Enomoto, S.; Abrahante, J. E.; Zhu, G.; Lancto, C. A.; Deng, M.; Liu, C.; Widmer, G.; Tzipori, S.; Buck, G. A.; Xu, P.; Bankier, A. T.; Dear, P. H.; Konfortov, B. A.; Spriggs, H. F.; Iyer, L.; Anantharaman, V.; Aravind, L.; Kapur, V. *Science* **2004**, *304*, 441-445.
- (5) Xu, P.; Widmer, G.; Wang, Y.; Ozaki, L. S.; Alves, J. M.; Serrano, M. G.; Puiu, D.; Manque, P.; Akiyoshi, D.; Mackey, A. J.; Pearson, W. R.; Dear, P. H.; Bankier, A. T.; Peterson, D. L.; Abrahamsen, M. S.; Kapur, V.; Tzipori, S.; Buck, G. A. *Nature* **2004**, *431*, 1107-1112.

#### *Construction of CpIMPDH-pET28a*

A ligase-free cloning method <sup>1</sup> was used with modifications to insert the *CpIMPDH* coding sequence into pET28a, yielding an N-terminal His-tagged construct with thrombin cleavage signal. First, using pTactac-CpIMPDH as template <sup>2</sup>, coding sequence was amplified with primers CpIMPDH-pETfor and CpIMPDH-pETrev where the 5' ends of each primer in bold lettering correspond to the pET28a vector and 3' ends correspond to the *CpIMPDH* coding sequence (Table S1). The PCR product was purified using a Qiagen PCR-cleanup kit and used as template with pET28a forward extender and pET28a reverse extender, where the 3' ends of each primer overlap with the 5' ends of the previous primer pair, resulting in an increase in the amount of sequence overlap with pET28a on the flanking regions of the construct. In both PCR steps, reactions contained 1X Phusion HF buffer, 200µM dNTPs, 200 nM each primer, 4% DMSO, and 1 U Phusion Hotstart polymerase (New England Biolabs). Cycling was performed with a 68° annealing temperature, according to manufacturer's instructions. The resulting product was purified using a Qiagen PCR-cleanup kit, and used as a megaprimer for whole plasmid synthesis, using EcoRI-digested pET28a as the template. Reactions contained 1X Phusion HF buffer, 200 µM dNTPs, 300 ng PCR product megaprimer, 50 ng pET28a-EcoRI and 1 U Phusion Hotstart in a 50 µl reaction. Cycling was performed at 98° for 50 sec, 98° for 10 sec, 60° for 30 sec, 72° for 2 min, and cycles 2-4 repeated 23 more times. The resulting product was transformed into XL10-gold cells (Stratagene) and resulting clones sequenced to ensure that no mutations were introduced.

#### *Generation of CpIMPDH-Δ90-134 deletion mutant.*

Using the CpIMPDH-pET28a clone obtained above as template, codons for residues 90-134 were replaced with codons for SerGlyGly by a modification of the megaprimer cloning method<sup>1</sup>. First, the  $\Delta$ 90-134 deletion primer and T7 primer were used to amplify a region of CpIMPDH-pET28a ranging from the T7 promoter to Val143, while replacing codons for residues 90-134 with codons for SerGlyGly. The resulting product was purified using a Qiagen PCR-cleanup kit and used as megaprimer in the whole plasmid synthesis reaction, with NcoI-digested CpIMPDH-pET28a as template. Reactions contained 1X Phusion HF buffer, 200  $\mu$ M dNTPs, 300 ng PCR product megaprimer, 50 ng CpIMPDH-pET28a-NcoI, and 1 U Phusion Hotstart in a 50  $\mu$ l reaction. Cycling was performed at 98° for 50 sec, 98° for 10 sec, 72° for 2.5 min, and cycles 2-4 repeated 23 more times. The resulting product was transformed into XL10-gold cells (Stratagene) and resulting clones sequenced.

#### Generation of *AquaB* strain of BL21(DE3).

To eliminate the possibility of contamination from endogenous *E. coli* IMPDH, the *guaB* gene was deleted using the methods and plasmids developed in<sup>3</sup>. First, primers IMPDH-KO-for and IMPDH-KO-rev were used in a PCR using PKD3 as a template, resulting in the chloramphenicol resistance gene flanked by FRT sites and chromosomal sequence adjacent to the *guaB* (IMPDH) gene of *E. coli*. The product was electroporated into BL21(DE3) containing PKD46, which codes for arabinose-dependent expression of FLP recombinase. Chloramphenicol-resistant colonies were confirmed by PCR with IMPDH-KO-for and -rev primers, and were cured of PKD46 by growth at 37° overnight. The resulting strain was able to grow on minimal media only when supplemented with guanosine.

Table S1. Primer Sequence.

|                                 |                                                                     |
|---------------------------------|---------------------------------------------------------------------|
| CpIMPDH-pETfor                  | 5'TGGTGCCTCGTGGTAGCCATATGGGTACAAAAACATAGGA<br>AAAGGCT               |
| CpIMPDH-pETrev                  | 5'CTCAGCTTCCTTTCGGGCTTTGTTATTTACTATAATTCATTA<br>CTTCTTTTACGATTTCAA  |
| pET28a forward extender         | 5'ATGGGCAGCAGCCATCATCATCATCACAGCAGCGGCCTG<br>GTGCCTCGTGGTAGCCAT     |
| pET28a reverse extender         | 5'TATGCTAGTTATTGCTCAGCGGTGGCAGCAGCCAACCTCAGCTT<br>CCTTTCGGGCTTTGTTA |
| $\Delta$ 90-134 deletion primer | 5'TACACCTATTGCTGCTCCAACCTCTTAAACCACCACTATTCTTG<br>ACTTTCAATACTTCATT |
| T7 primer                       | 5'TAATACGACTCACTATAGGGG                                             |
| IMPDH-KO-for                    | 5'CGGCAATATTTATTAACCACTCTGGTCGAGATATTGCCCTGTA<br>GGCTGAGCTGCTTCG    |
| IMPDH-KO-rev                    | 5'GTCCAGAATGAGGATGCGATGCTTATGAATGTTTTCCGTCATA<br>TGAATATCCTCCTTAG   |

#### Expression of CpIMPDH- $\Delta$ 90-134

CpIMPDH- $\Delta$ 90-134-pET28a plasmid was transformed into BL21(DE3 $\Delta$ *guaB*), spread onto LB agar plates supplemented with 25  $\mu$ g/ml kanamycin and grown overnight at 37°. An isolated colony was inoculated into 5 ml LB containing 25  $\mu$ g/ml kanamycin cultures and shaken overnight at 37°. The cultures were used to inoculate 1 L of LB containing 25  $\mu$ g/ml kanamycin, and the resulting culture was shaken at 30° until reaching an OD<sub>600</sub> = 1, after which the culture was moved to 25° and shaken for an

additional 30 minutes, before induction with 0.5 mM IPTG and shaking overnight at 25°. Cells were harvested by centrifugation, lysed by sonication in 1X binding buffer (0.2 M sodium phosphate, 0.5 M NaCl) supplemented with 20 mM imidazole pH 8. The lysate was cleared by centrifugation and applied to Ni-NTA HisTrap beads (GE Healthcare). The beads were washed with binding buffer supplemented with 20, 50 and 100 mM imidazole and *Cp*IMPDH-Δ90-134 was eluted with binding buffer supplemented with 500 mM imidazole. The eluted fractions were dialyzed against 20 mM Tris pH 7.5, 50 mM NaCl, after which thrombin (Haematologic Technologies) was added at a ratio of 1:500 (thrombin:IMPDH, w:w) and incubated overnight at 4°. Thrombin was subsequently removed by incubation with 50 μl benzamidine-Sepharose beads (GE Healthcare). The protein was concentrated to 5 mg/ml and used for crystallization trials.

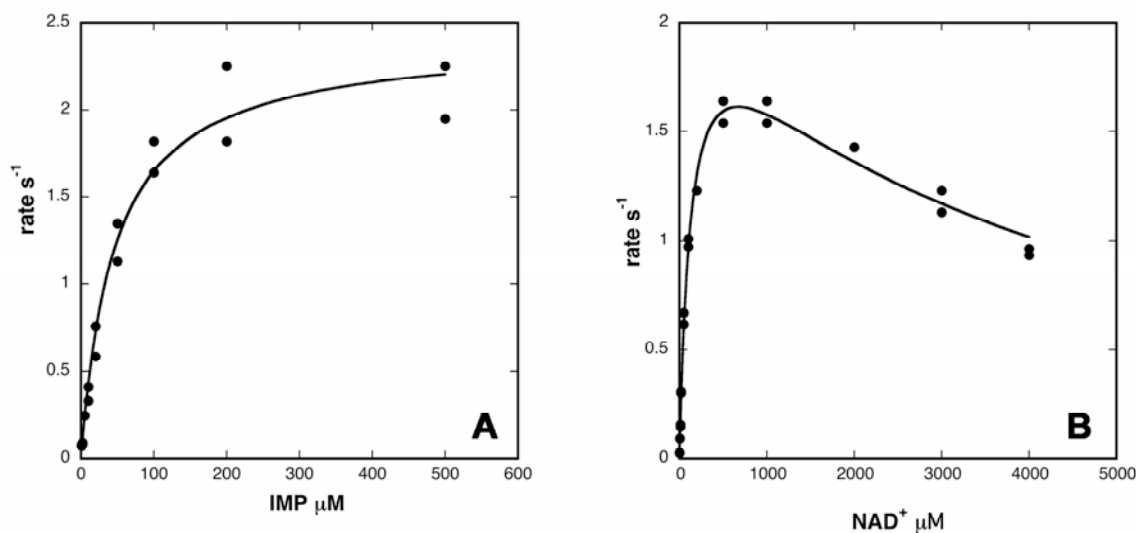

Figure S1. Kinetics of *Cp*IMPDH-Δ90-134. Conditions: 50 mM TrisHCl, pH 8.0, 100 mM KCl, 1 mM dithiothreitol. A. IMP varied,  $[NAD^+] = 500 \mu\text{M}$ .  $k_{\text{cat}} = 2.4 \pm 0.1 \text{ s}^{-1}$ ,  $K_{\text{m}}(\text{IMP}) = 46 \pm 5 \mu\text{M}$ . B.  $NAD^+$  varied,  $[\text{IMP}] = 1 \text{ mM}$ .  $k_{\text{cat}} = 2.3 \pm 0.1$ ,  $K_{\text{m}}(NAD^+) = 130 \pm 10 \mu\text{M}$ ,  $K_{\text{ii}}(NAD^+) = 3.4 \pm 0.4 \text{ mM}$ . These values are very similar to those of the wild-type enzyme:  $k_{\text{cat}} = 3.3 \text{ s}^{-1}$ ,  $K_{\text{m}}(\text{IMP}) = 29 \mu\text{M}$ ,  $K_{\text{m}}(NAD^+) = 150 \mu\text{M}$ ,  $K_{\text{ii}}(NAD^+) = 2.9 \pm 0.7 \text{ mM}$ <sup>8</sup>

*Crystallography.*

The structure of CpIMPDPH- $\Delta$ 90-134-C64 was solved using the CCP4 molecular replacement program MOLREP<sup>4</sup> using a CpIMPDPH monomer as the search model. The structure was refined using REFMAC<sup>5</sup> and modeling was performed with COOT<sup>6</sup>. Refinement statistics are shown in Table S2.

Table S2: Statistics for Data Collection and Refinement

|                                                       | Data Collection                     |                                |
|-------------------------------------------------------|-------------------------------------|--------------------------------|
|                                                       | WtCpIMPDPH                          | CpIMPDPH( $\Delta$ 90-134)-C64 |
| x-ray wavelength (Å)                                  | 0.97946                             | 0.9194                         |
| temperature                                           | 100K                                | 100K                           |
| space group                                           | <i>P2<sub>1</sub>2<sub>1</sub>2</i> | <i>P2<sub>1</sub></i>          |
| unit cell (Å)                                         |                                     |                                |
| a                                                     | 119.1                               | 83.481                         |
| b                                                     | 153.3                               | 166.141                        |
| c                                                     | 98.2                                | 101.289                        |
| Cell angles (degrees)                                 |                                     |                                |
| $\alpha$                                              | 90                                  | 90                             |
| $\beta$                                               | 90                                  | 105.14                         |
| $\gamma$                                              | 90                                  | 90                             |
| resolution (Å)                                        | 3.2                                 | 2.8                            |
| total no. of reflections                              | 207,910                             | 3,394,714                      |
| no. of unique reflections                             | 30,575                              | 65,589                         |
| <I/ $\sigma$ (I)>                                     | 12.1 (3.1)                          | 19.4 (5.2)                     |
| completeness of data (%)                              | 99 (99)                             | 100 (100)                      |
| R-merge <sup>a</sup> (%)                              | 18 (63)                             | 9.3 (38.3)                     |
|                                                       | Refinement                          |                                |
| resolution range (Å)                                  | 50 - 3.2                            | 100-2.8                        |
| reflections used (working/free)                       | 28,947/1,536                        | 61,921/3,303                   |
| R-factor <sup>b</sup> /R-free (%)                     | 26.9/32.8                           | 22.4/26.6                      |
| total number of non-hydrogen atoms in asymmetric unit | 8,563                               | 18,779                         |
| rms deviations from ideal geometry                    |                                     |                                |
| bond length (Å)                                       | 0.01                                | 0.006                          |
| bond angles (deg)                                     | 1.45                                | 1.00                           |
| mean B value                                          | 54                                  | 53                             |
| PDB accession code                                    | 3FFS                                | 3KHJ                           |

<sup>a</sup> R-merge =  $\Sigma|I_{\text{obs}} - I_{\text{avg}}| / \Sigma I_{\text{avg}}$ , over all symmetry-related observations. <sup>b</sup> R-factor =  $\Sigma|F_{\text{obs}} - F_{\text{avg}}| / \Sigma F_{\text{avg}}$ , over all reflections.

*Synthetic materials and methods.*

Unless otherwise noted, all reagents and solvents were purchased from commercial sources and used without further purification. All reactions were performed under nitrogen atmosphere unless otherwise noted. The NMR spectra were obtained using a 400 MHz spectrometer. All  $^1\text{H}$ NMR spectra are reported in  $\delta$  units ppm and are referenced to tetramethylsilane (TMS) if conducted in  $\text{CDCl}_3$  or to the central line of the quintet at 2.49 ppm for samples in DMSO- $d_6$ . All chemical shift values are also reported with multiplicity, coupling constants, and proton count. All  $^{13}\text{C}$  NMR spectra are reported in  $\delta$  units ppm and are referenced to the central line of the triplet at 77.23 ppm if conducted in  $\text{CDCl}_3$  or to the central line of the septet at 39.5 ppm for samples in DMSO- $d_6$ . Coupling constants (J values) are reported in hertz. Column chromatography was carried out on SILICYCLE SiliaFlash silica gel F60 (40-63  $\mu\text{m}$ , mesh 230-400). All test compounds had purity 95% as determined by high performance liquid chromatography (HPLC) analysis, unless otherwise noted. The elemental composition of compounds agreed to within (0.4% of the calculated values. Chemical and enantiomeric purities were determined using high performance liquid chromatography (HPLC) analysis on a Hewlett-Packard 1100 series instrument equipped with a quaternary pump and a Daicel Chiralpak AD column (250 x 4.6 mm). UV absorption was monitored at  $\lambda=254$  nm. The injection volume was 1  $\mu\text{L}$ . HPLC gradient was 50% *n*-hexane and 50% *i*-propanol with a flow rate of 1.0 mL/min. In some cases, chemical purity was determined using a Agilent 1100 HPLC instrument equipped with a quaternary pump and a Zorbax SB-C8 column (30 mm x 4.6 mm, 3.5  $\mu\text{m}$ ). UV absorption was monitored at  $\lambda=254$  nm. The injection volume was 5  $\mu\text{L}$ . HPLC gradient went from 5% acetonitrile and 95% water to 95% acetonitrile and 5% water (both solvents contain 0.1% trifluoroacetic acid) over 1.9 min with a total run time of 2.5 min and a flow rate of 3.0 mL/min.

*Synthesis of bromoacetylamides 3.*

To a dried round-bottom flask fitted with a nitrogen inlet was charged with anhydrous DCM (4 mL), 4-bromoaniline (200 mg, 1.16 mmol), and a catalytic amount of DMAP. The reaction mixture was cooled to 0  $^\circ\text{C}$  and bromoacetylchloride (274 mg, 1.74 mmol) was added dropwise over the period of 10 min. The resulting solution was stirred at 0  $^\circ\text{C}$  for 30 min and then for another 2-3 h at room temperature. After 2h the reaction mixture was quenched with water. The reaction mixture was further diluted with water (50 mL) and extracted with DCM (3 x 50 mL). The organic extracts were combined, dried over anhydrous  $\text{MgSO}_4$ , filtered, concentrated *in vacuo*, and the product obtained was used for the next step without any further purification.

*Synthetic materials and methods.*

Unless otherwise noted, all reagents and solvents were purchased from commercial sources and used without further purification. All reactions were performed under nitrogen atmosphere unless otherwise noted. The NMR spectra were obtained using a 400 MHz spectrometer. All  $^1\text{H}$ NMR spectra are reported in  $\delta$  units ppm and are referenced to tetramethylsilane (TMS) if conducted in  $\text{CDCl}_3$  or to the central line of the quintet at 2.49 ppm for samples in DMSO- $d_6$ . All chemical shift values are also reported with multiplicity, coupling constants, and proton count. All  $^{13}\text{C}$  NMR spectra are reported in  $\delta$  units ppm and are referenced to the central line of the triplet at 77.23 ppm if

conducted in CDCl<sub>3</sub> or to the central line of the septet at 39.5 ppm for samples in DMSO-d<sub>6</sub>. Coupling constants (*J* values) are reported in hertz. Column chromatography was carried out on SILICYCLE SiliaFlash silica gel F60 (40-63 μm, mesh 230-400). All test compounds had purity 95% as determined by high performance liquid chromatography (HPLC) analysis, unless otherwise noted. The elemental composition of compounds agreed to within (0.4% of the calculated values. Chemical and enantiomeric purities were determined using high performance liquid chromatography (HPLC) analysis on a Hewlett-Packard 1100 series instrument equipped with a quaternary pump and a Daicel Chiralpak AD column (250 x 4.6 mm). UV absorption was monitored at λ=254 nm. The injection volume was 1 μL. HPLC gradient was 50% *n*-hexane and 50% *i*-propanol with a flow rate of 1.0 mL/min. In some cases, chemical purity was determined using a Agilent 1100 HPLC instrument equipped with a quaternary pump and a Zorbax SB-C8 column (30 mm x 4.6 mm, 3.5 μm). UV absorption was monitored at λ=254 nm. The injection volume was 5 μL. HPLC gradient went from 5% acetonitrile and 95% water to 95% acetonitrile and 5% water (both solvents contain 0.1% trifluoroacetic acid) over 1.9 min with a total run time of 2.5 min and a flow rate of 3.0 mL/min.

#### *Synthesis of 2-substituted benzimidazoles.*

To a dried round-bottom flask fitted with a nitrogen inlet was added anhydrous DMF (4 mL), *o*-phenylenediamine (200 mg, 1.85 mmol) and the respective aryl aldehyde (2.2 mmol) and the mixture was stirred for 5 min before sodium metabisulfite (420 mg, 2.2 mmol) was added. The reaction mixture was stirred at room temperature for 7-8 h. Once the starting materials were consumed (followed by TLC) the solvent was removed by *in vacuo*. The solid obtained was dissolved in ethyl acetate (50 mL) and washed with water (50 mL). The aqueous layer was extracted with ethyl acetate (3 x 50 mL). The organic extracts were combined, dried over anhydrous MgSO<sub>4</sub>, filtered, and concentrated *in vacuo*. The crude product was purified by flash column chromatography eluting with methanol/chloroform (1:9) to furnish 2-substituted benzimidazole in 65-70% yield.

#### *Synthesis of C-derivatives.*

To a dried round-bottom flask fitted with a nitrogen inlet was added anhydrous DMF (4 mL), a 2-aryl benzimidazole (0.50 mmol) a bromoacetyl amide (0.52 mmol) and anhydrous K<sub>2</sub>CO<sub>3</sub> (540 mg, 1.56 mmol). The reaction mixture was stirred at room temperature for 7-8 h. Once the starting materials were consumed (followed by TLC) the solvent was removed by *in vacuo*. The solid obtained was dissolved in ethyl acetate (20 mL) and washed with water (50 mL). The aqueous layer was extracted with ethyl acetate (3 x 50 mL). The organic extracts were combined, dried over anhydrous MgSO<sub>4</sub>, filtered, and concentrated *in vacuo*. The crude product was purified by flash column chromatography eluting with methanol/chloroform (1:9) to furnish C derivatives in 60-80% yield.

#### **C10**

Yield 87 %; <sup>1</sup>H NMR (DMSO-d<sub>6</sub>, 400 MHz) δ 5.66 (s, 2H), 7.24 (bs, 2H), 7.33 (d, *J* = 8 Hz, 2H), 7.54 (d, *J* = 7.6 Hz, 2H), 7.62 (bs, 1H), 7.66 (bs, 1H), 8.52 (s, 1H), 9.25 (s, 1H), 10.56 (s, 1H); <sup>13</sup>C NMR (DMSO-d<sub>6</sub>, 100 MHz) δ 48.82, 111.36, 119.59, 121.22, 122.87, 123.0, 123.44, 127.53, 129.40, 137.16, 138.44, 142.93, 147.71, 155.99, 166.74

**C14**

Yield 80 %;  $^1\text{H}$  NMR ( $\text{CDCl}_3$ , 400 MHz)  $\delta$  5.21 (s, 2H), 7.24 (bs, 1H), 7.36-7.46 (m, 3H), 7.70 (d,  $J = 7.2$  Hz, 1H), 7.79 (d,  $J = 8$  Hz, 1H), 8.38 (s, 1H), 9.09 (s, 1H), 10.07 (s, 1H);  $^{13}\text{C}$  NMR ( $\text{CDCl}_3$  &  $\text{DMSO-d}_6$ , 100 MHz)  $\delta$  48.20, 109.92, 102.35, 114.73, 119.46, 120.99, 122.97, 123.39, 128.70, 137.14, 139.92, 142.68, 144.47, 151.65, 165.57

**C61**

Yield 85 %;  $^1\text{H}$  NMR ( $\text{DMSO-d}_6$ , 400 MHz)  $\delta$  5.72 (s, 2H), 7.27-7.33 (m, 4H), 7.54 (d,  $J = 8.4$  Hz, 2H), 7.70 (dd,  $J_1 = 18.8$  Hz,  $J_2 = 8.0$  Hz, 2H), 7.92 (d,  $J = 2.8$  Hz, 1H), 7.99 (d,  $J = 3.2$  Hz, 1H), 10.62 (s, 1H);  $^{13}\text{C}$  NMR ( $\text{DMSO-d}_6$ , 100 MHz)  $\delta$  48.45, 111.68, 120.11, 121.30, 123.66, 123.76, 124.69, 129.43, 137.62, 138.31, 138.34, 142.56, 144.89, 166.40

**C64**

Yield 75 %;  $^1\text{H}$  NMR ( $\text{CDCl}_3$ , 400 MHz)  $\delta$  5.33 (s, 2H), 7.23 (s, 2H), 7.35-7.42 (m, 4H), 7.64 (d,  $J = 2.8$  Hz, 1H), 7.74 (d,  $J = 8$  Hz, 1H), 7.82 (d,  $J = 7.6$  Hz, 1H), 8.08 (d,  $J = 3.2$  Hz, 1H), 10.07 (s, 1H);  $^{13}\text{C}$  NMR ( $\text{DMSO-d}_6$ , 100 MHz)  $\delta$  48.62, 111.37, 119.60, 121.23, 122.88, 123.00, 123.04, 123.45, 123.45, 123.48, 129.41, 138.44, 142.94, 147.71, 156.00, 166.74

**C90**

Yield 82 %;  $^1\text{H}$  NMR ( $\text{CDCl}_3$ , 400 MHz)  $\delta$  5.24 (s, 2H), 7.19-7.36 (m, 5H), 7.65-7.75 (m, 5H), 8.16 (s, 1H), 8.34 (s, 1H), 9.07 (s, 1H), 10.07 (s, 1H);  $^{13}\text{C}$  NMR ( $\text{DMSO-d}_6$ , 100 MHz)  $\delta$  48.67, 111.37, 115.78, 119.59, 120.37, 122.88, 122.98, 123.43, 125.30, 127.12, 127.89, 128.10, 129.15, 130.38, 134.02, 137.02, 137.19, 142.97, 147.57, 147.77, 155.98, 166.80

**C97**

Yield 79 %;  $^1\text{H}$  NMR ( $\text{CDCl}_3$ , 400 MHz)  $\delta$  5.44 (s, 2H), 7.33-7.47 (m, 5H), 7.67 (d,  $J = 3.2$  Hz, 1H), 7.72-7.76 (m, 3H), 7.82 (d,  $J = 8$  Hz, 1H), 7.85 (d,  $J = 8.8$  Hz, 1H), 8.16 (d,  $J = 3.2$  Hz, 1H), 8.23 (bs, 1H), 10.29 (s, 1H);  $^{13}\text{C}$  NMR ( $\text{DMSO-d}_6$ , 100 MHz)  $^{13}\text{C}$  NMR ( $\text{DMSO-d}_6$ , 100 MHz)  $\delta$  48.5, 111.77, 115.81, 120.12, 120.36, 123.62 (2C), 124.60, 125.34, 127.15, 127.92, 128.11, 129.19, 130.41, 134.03, 136.99, 137.68, 142.66, 144.89, 145.85, 159.95, 166.49.

**C84**

Yield 78 %;  $^1\text{H}$  NMR ( $\text{CDCl}_3$ , 400 MHz)  $\delta$  5.34 (s, 2H), 7.28 (t,  $J = 8.4$  Hz, 1H), 7.31 (t,  $J = 8.8$  Hz, 1H), 7.38 (t,  $J = 7.2$  Hz, 1H), 7.45 (t,  $J = 7.6$  Hz, 1H), 7.69 (d,  $J = 3.2$  Hz, 1H), 7.74 (s, 1H), 7.76 (d,  $J = 8.0$  Hz, 1H), 7.84 (d,  $J = 8.0$  Hz, 1H), 8.12 (d,  $J = 3.2$  Hz, 1H), 10.45 (s, 1H);  $^{13}\text{C}$  NMR ( $\text{DMSO-d}_6$ , 100 MHz)  $\delta$  48.60, 111.74, 119.74, 120.12, 120.86, 123.64 (2C), 124.62, 125.50, 131.50, 131.74, 137.60, 139.49, 142.60, 144.88, 145.71, 159.82, 166.90.

**C86**

Yield 75 %;  $^1\text{H}$  NMR ( $\text{DMSO-d}_6$ , 400 MHz)  $\delta$  5.70 (s, 2H), 7.26 (t,  $J = 2$  Hz, 1H), 7.28 (t,  $J = 2$  Hz, 1H), 7.46 (dd,  $J_1 = 8.8$  Hz,  $J_2 = 2.4$  Hz, 1H), 7.57 (d,  $J = 8.8$  Hz, 1H), 7.64-7.66 (m, 1H), 7.69-7.71 (m, 1H), 7.91 (d,  $J = 2.4$  Hz, 1H), 8.5 (d,  $J = 1.6$  Hz, 1H), 9.28

(d,  $J = 2.4$  Hz, 1H), 10.77 (s, 1H) ;  $^{13}\text{C}$  NMR (DMSO- $d_6$ , 100 MHz)  $\delta$  48.71, 111.37, 119.60, 119.75, 120.86, 122.90, 123.03, 123.47, 125.45, 131.48, 131.72, 137.15, 139.55, 142.92, 147.43, 147.66, 156.03, 167.23

## REFERENCES

- (1) Geiser, M.; Cebe, R.; Drewello, D.; Schmitz, R. *Biotechniques* **2001**, *31*, 88-90, 92.
- (2) Umejiego, N. N.; Li, C.; Riera, T.; Hedstrom, L.; Striepen, B. *J Biol Chem* **2004**, *279*, 40320-40327.
- (3) Datsenko, K. A.; Wanner, B. L. *Proc Natl Acad Sci U S A* **2000**, *97*, 6640-5.
- (4) Vagin, A.; Teplyakov, A. *J. Appl. Cryst.* **1997**, *30*, 1022-1025.
- (5) Murshudov, G. N.; Vagin, A. A.; Dodson, E. J. *Acta crystallographica* **1997**, *53*, 240-255.
- (6) Emsley, P.; Cowtan, K. *Acta crystallographica* **2004**, *60*, 2126-2132.



## NMR Spectra

CID

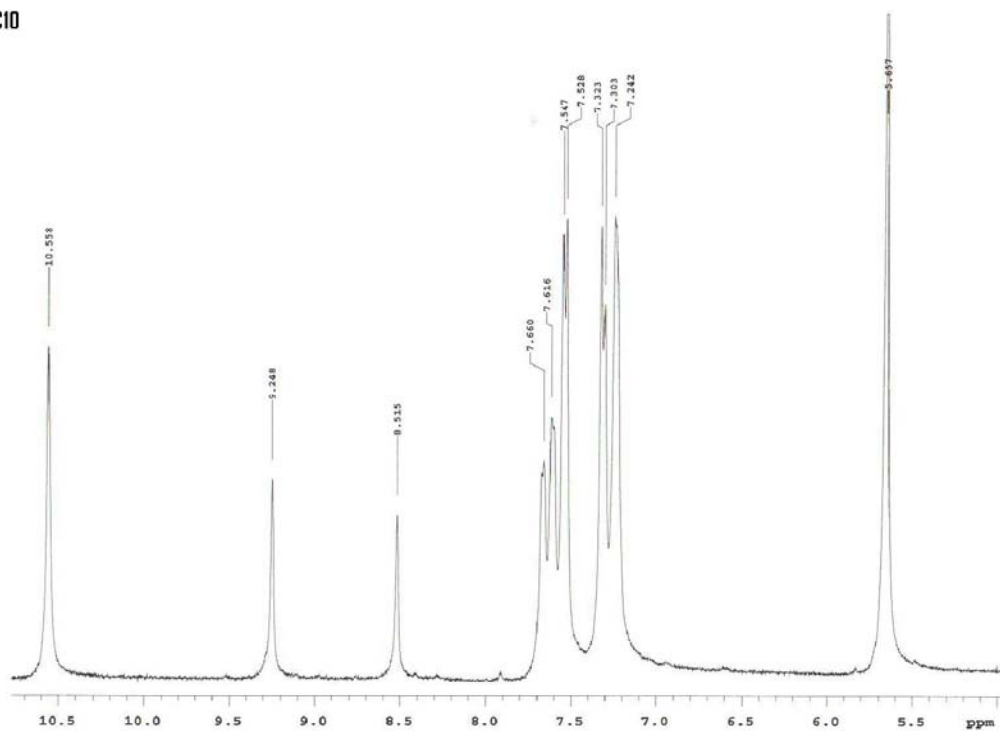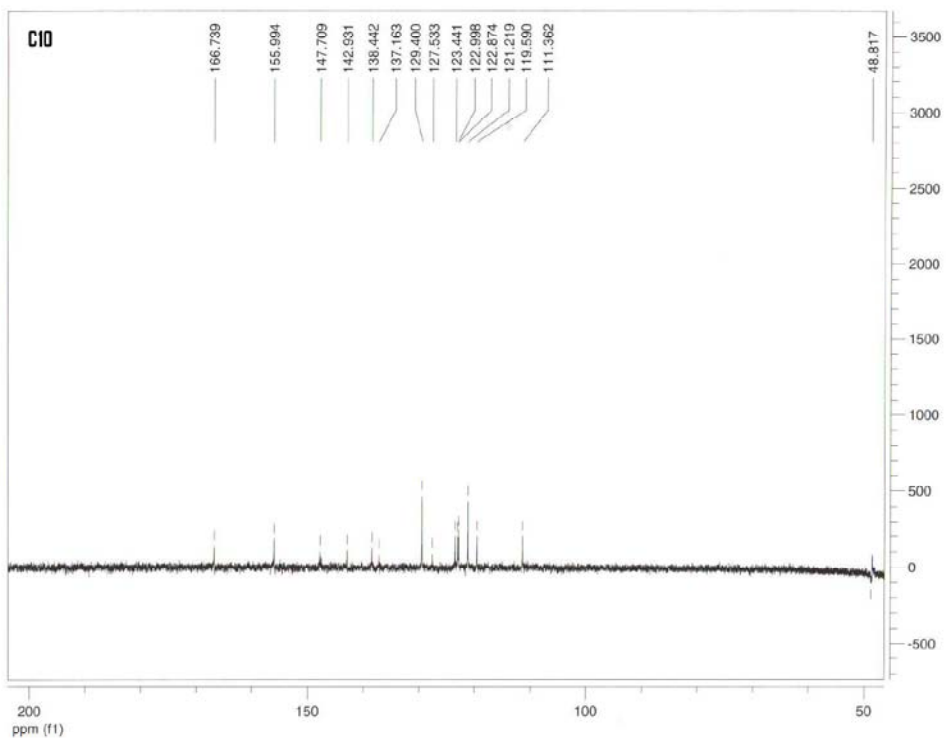

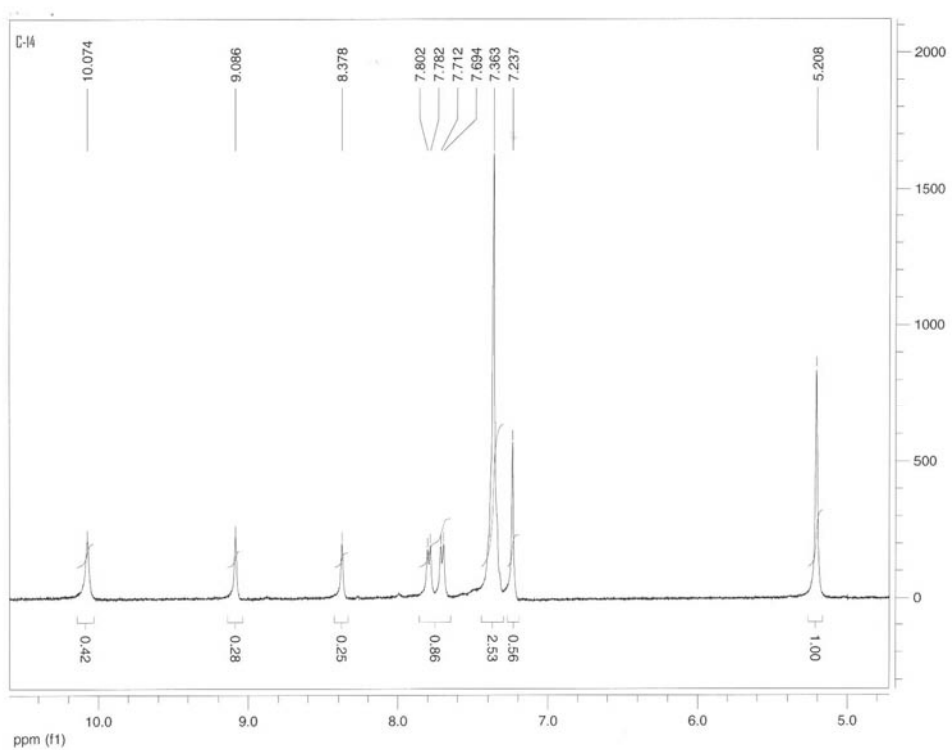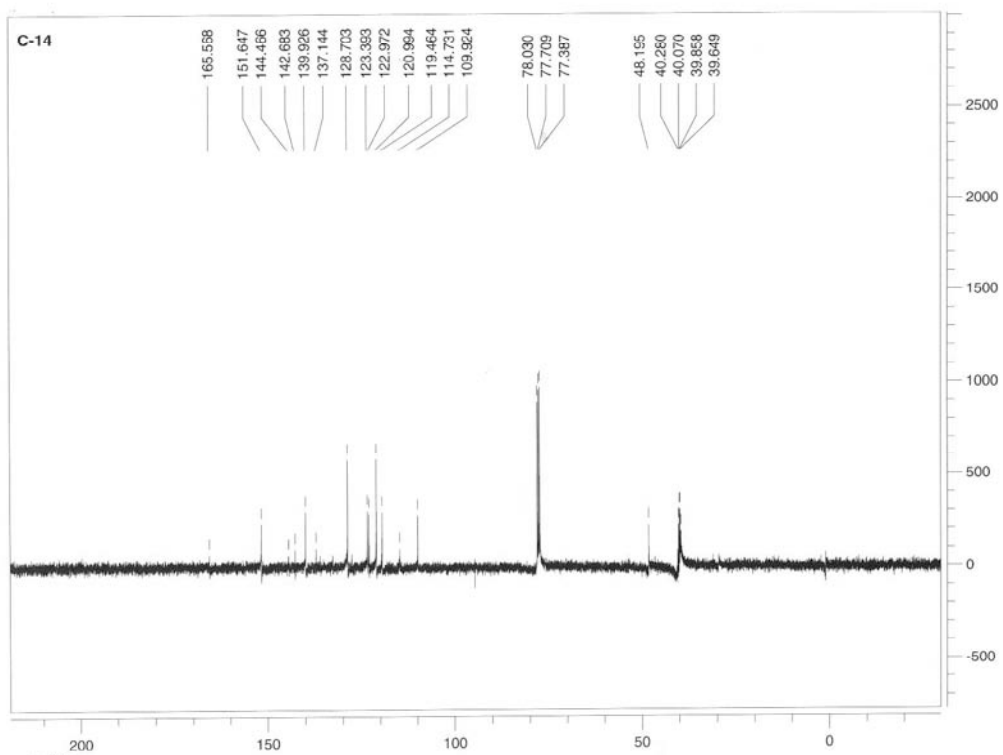

C61

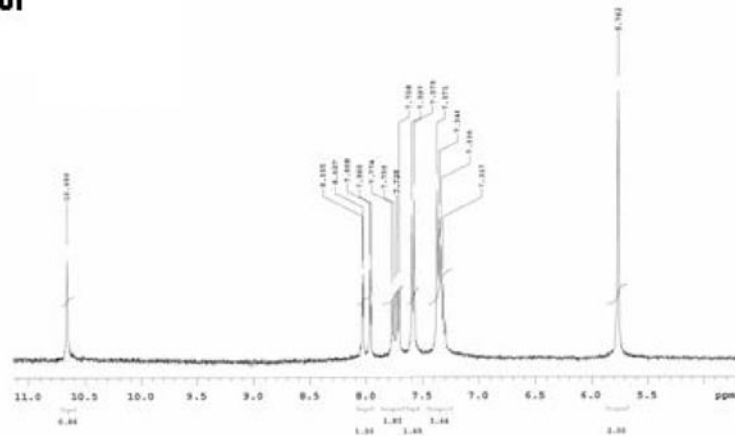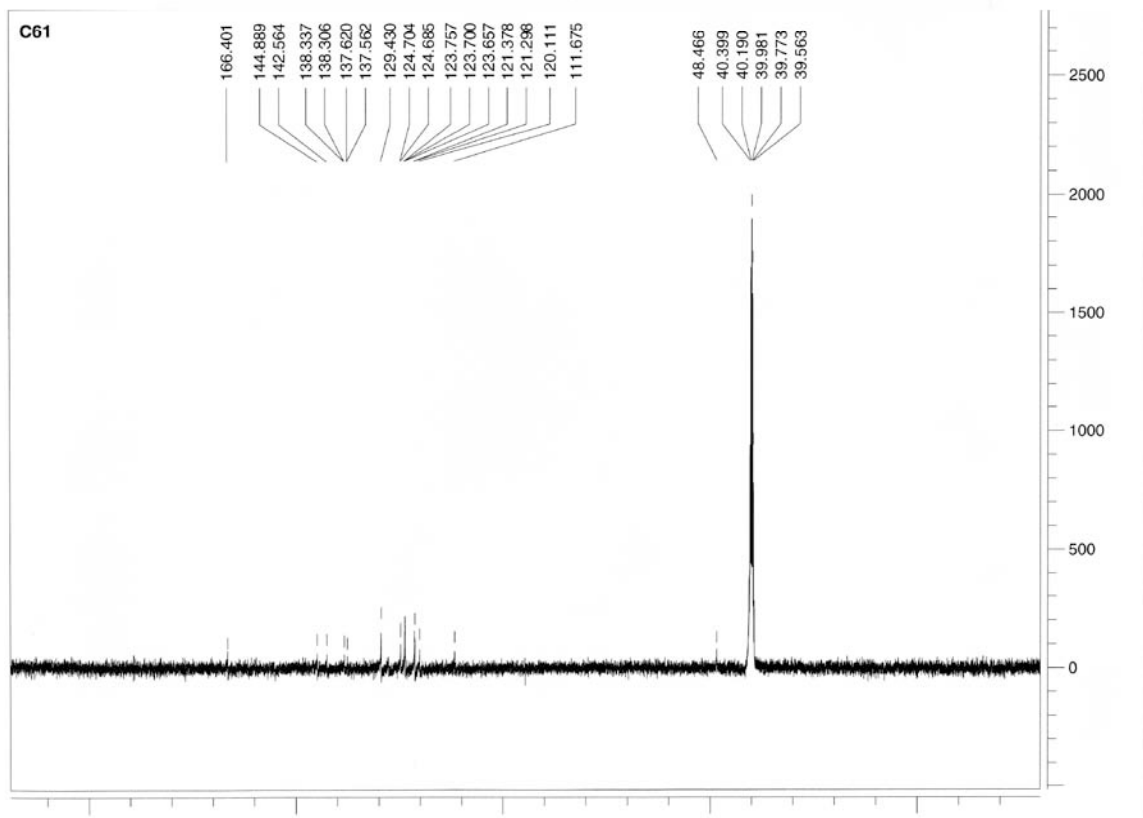

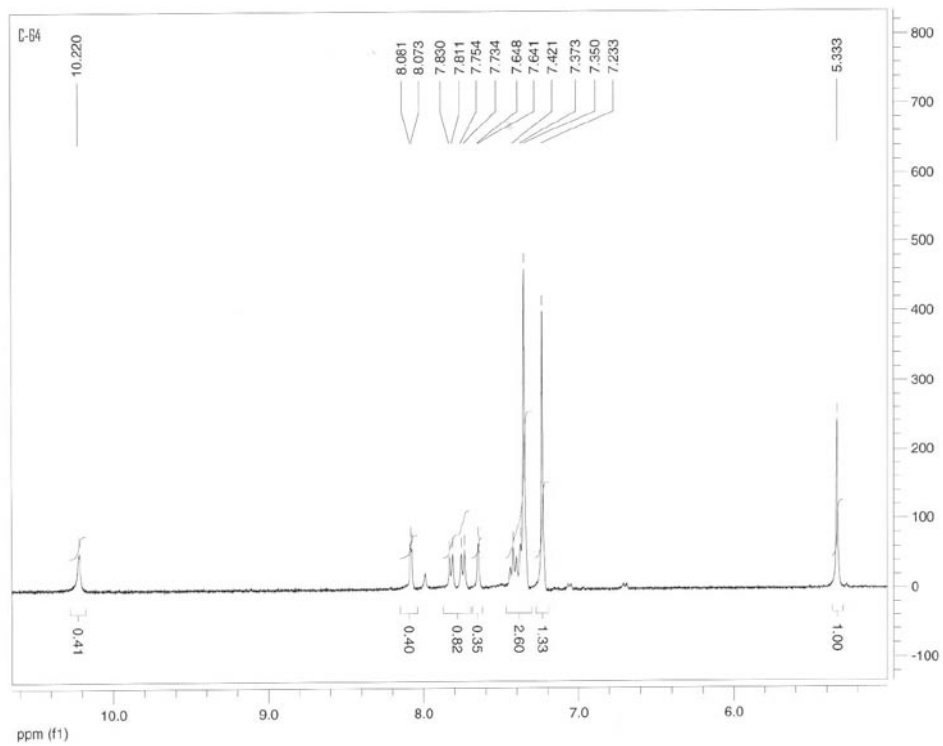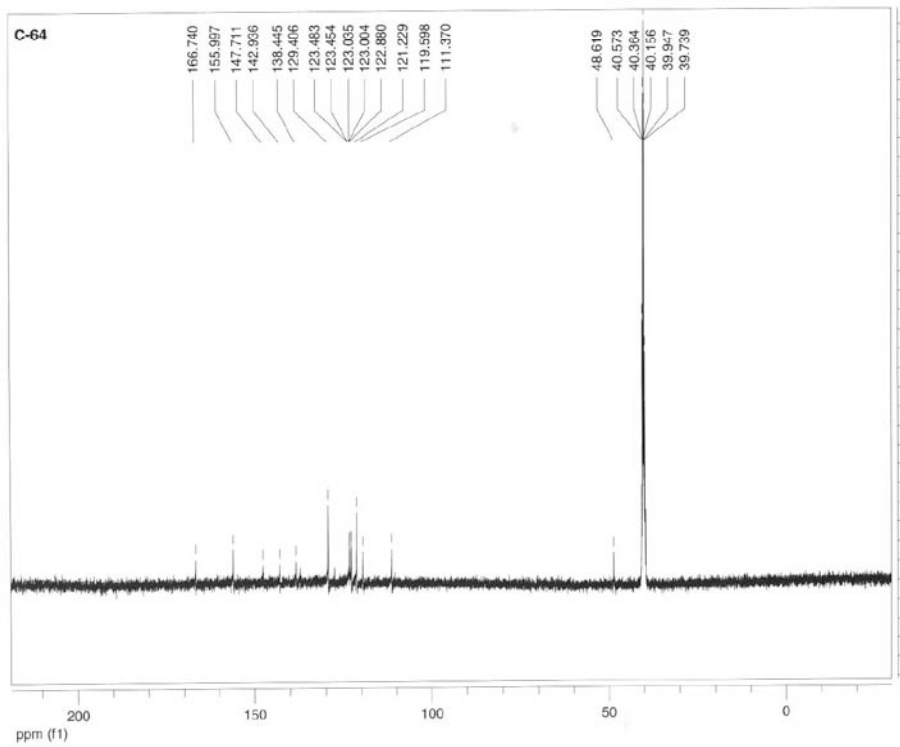

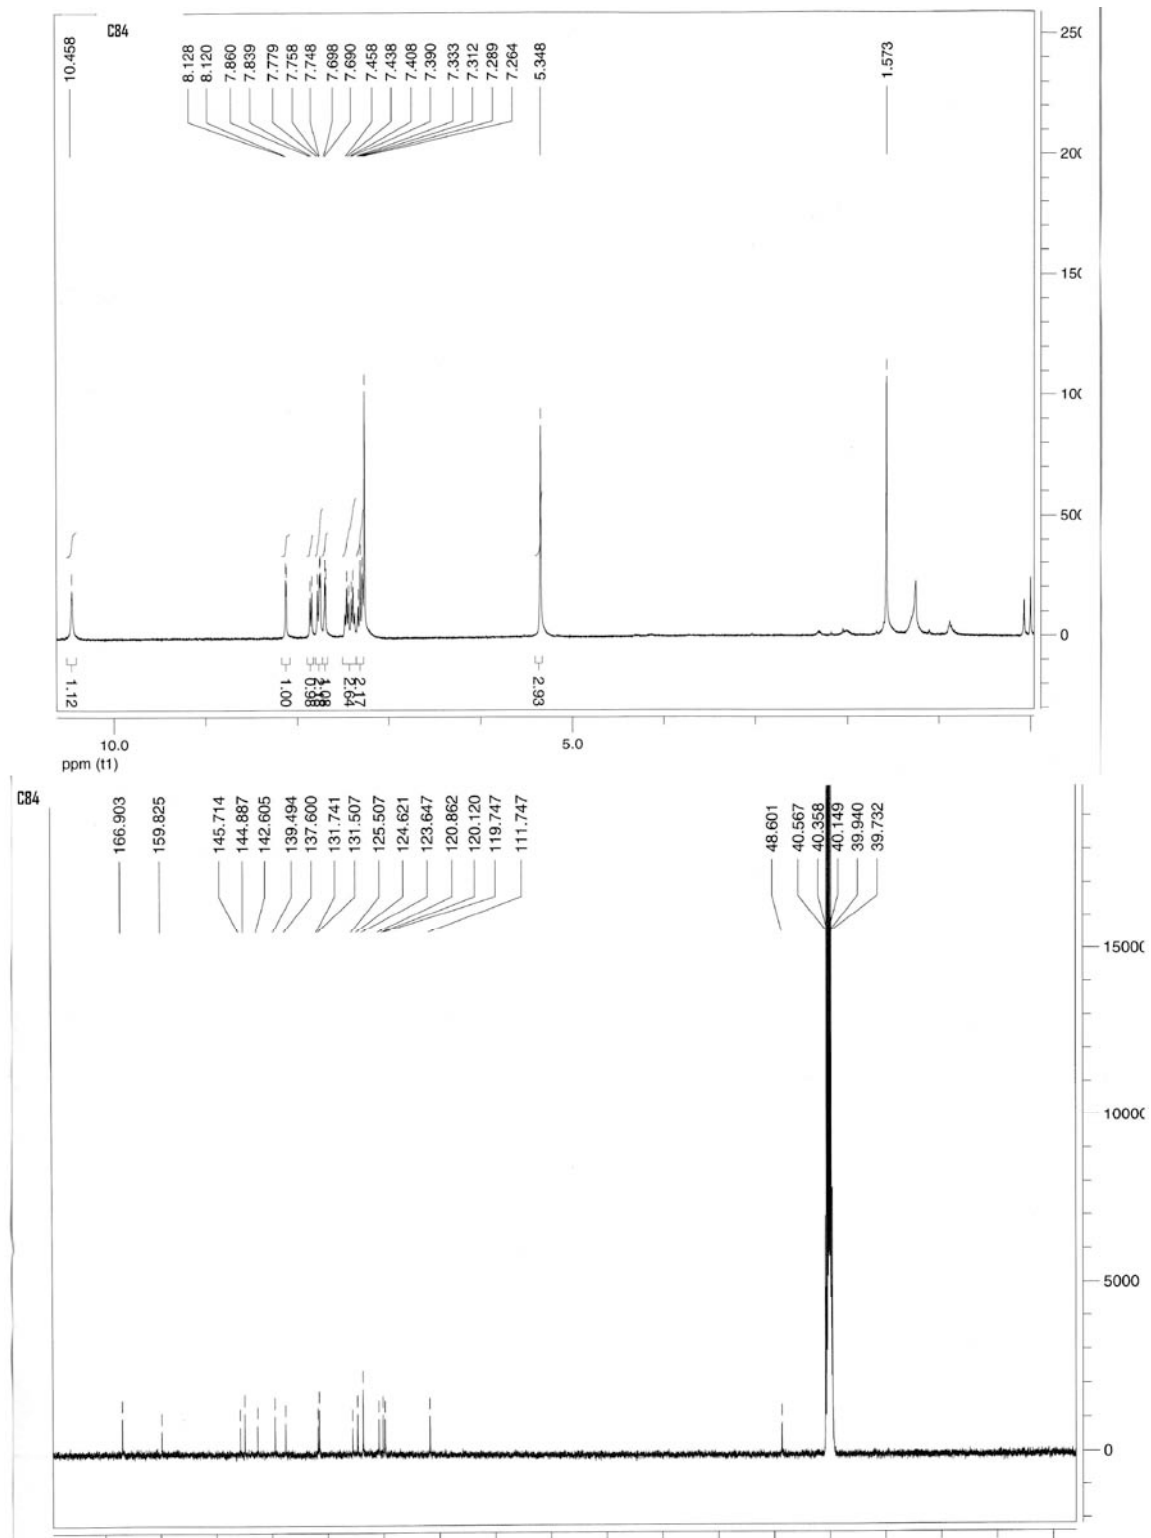

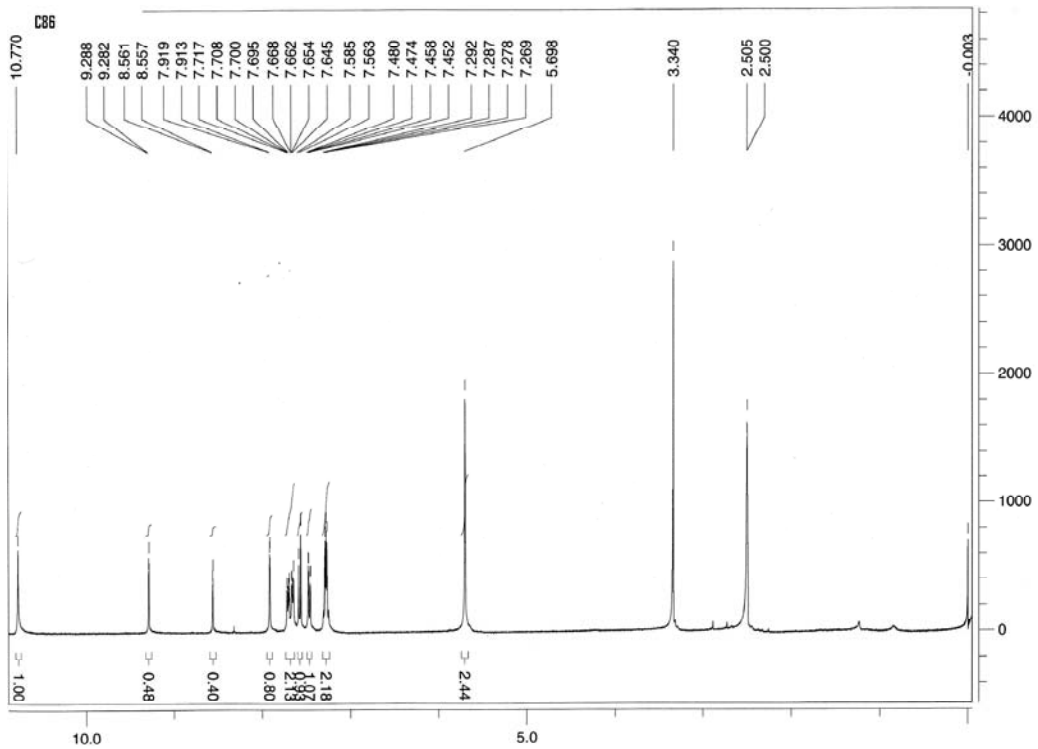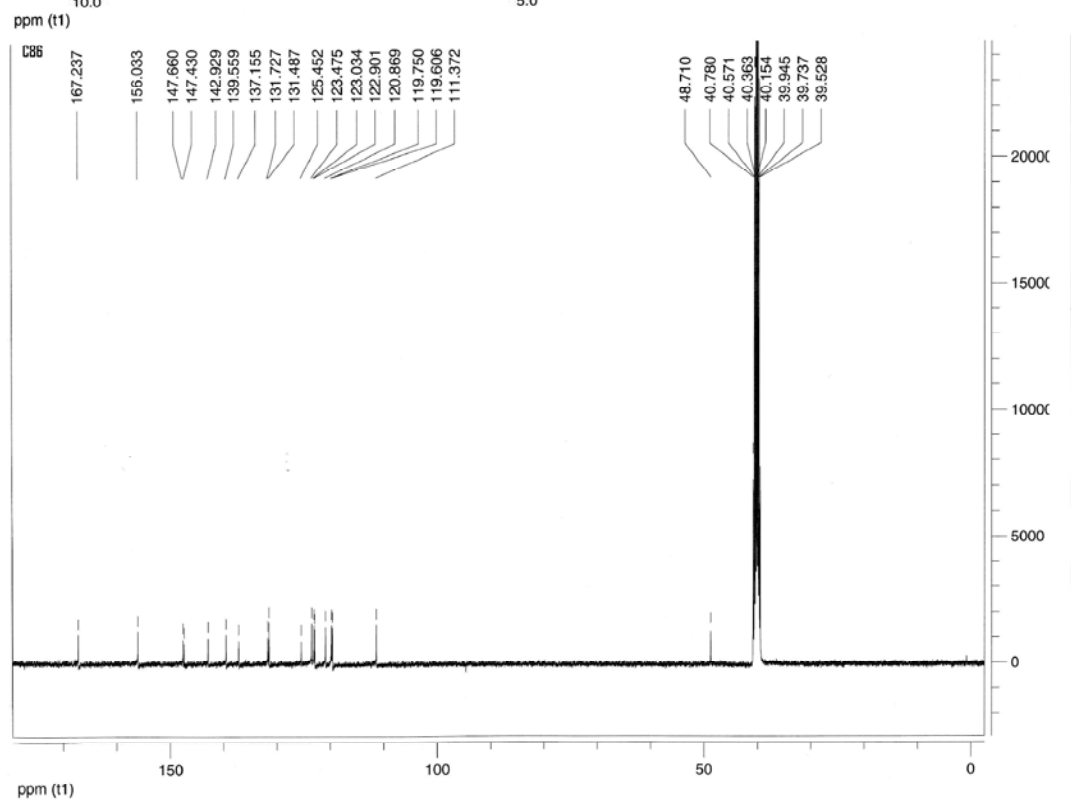

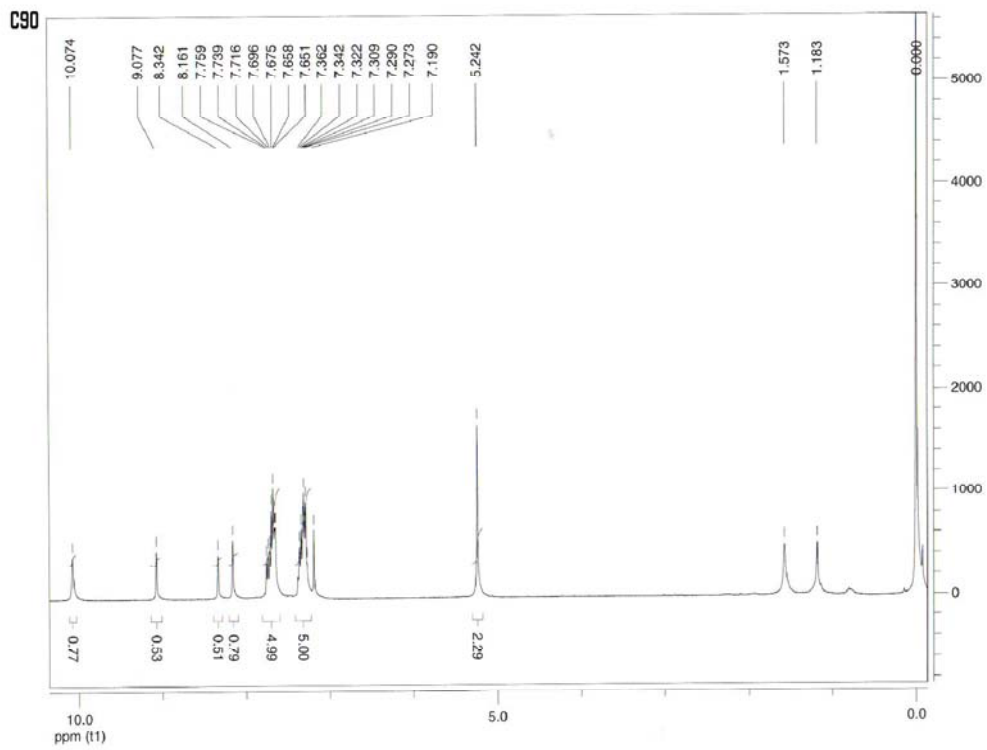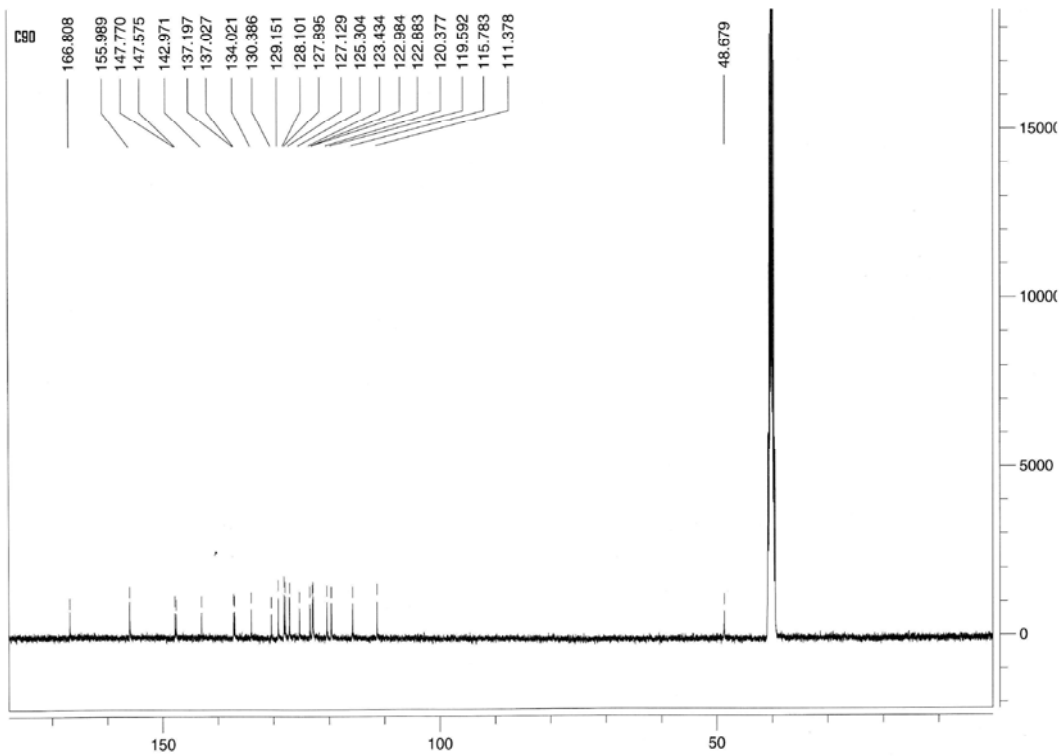

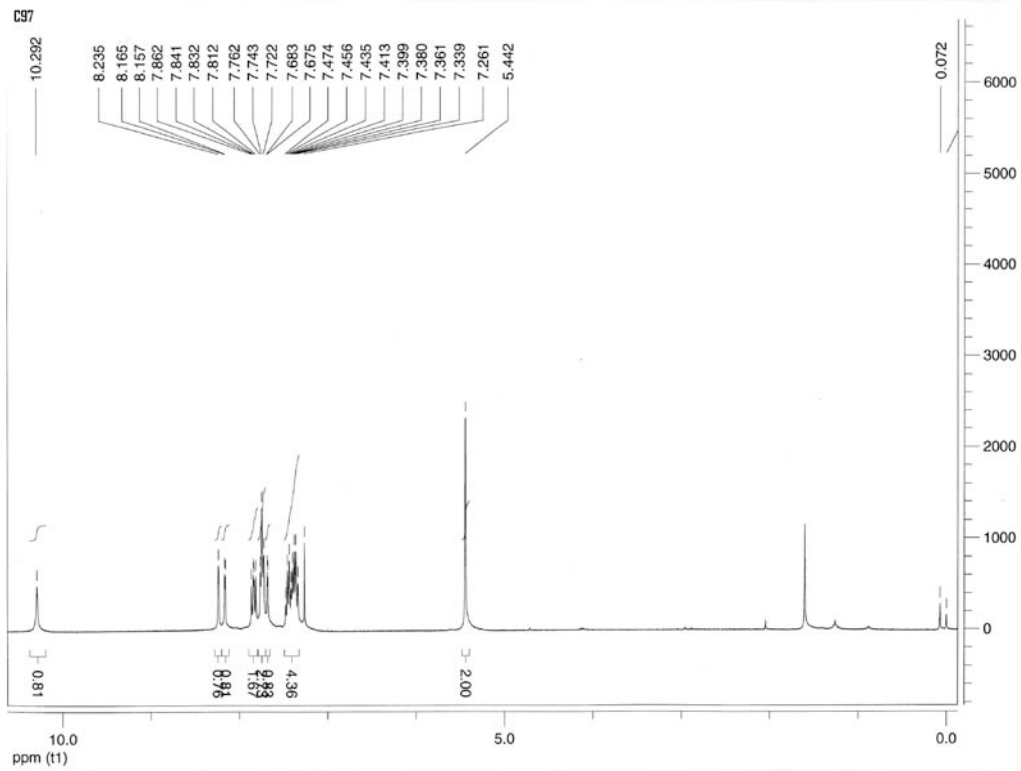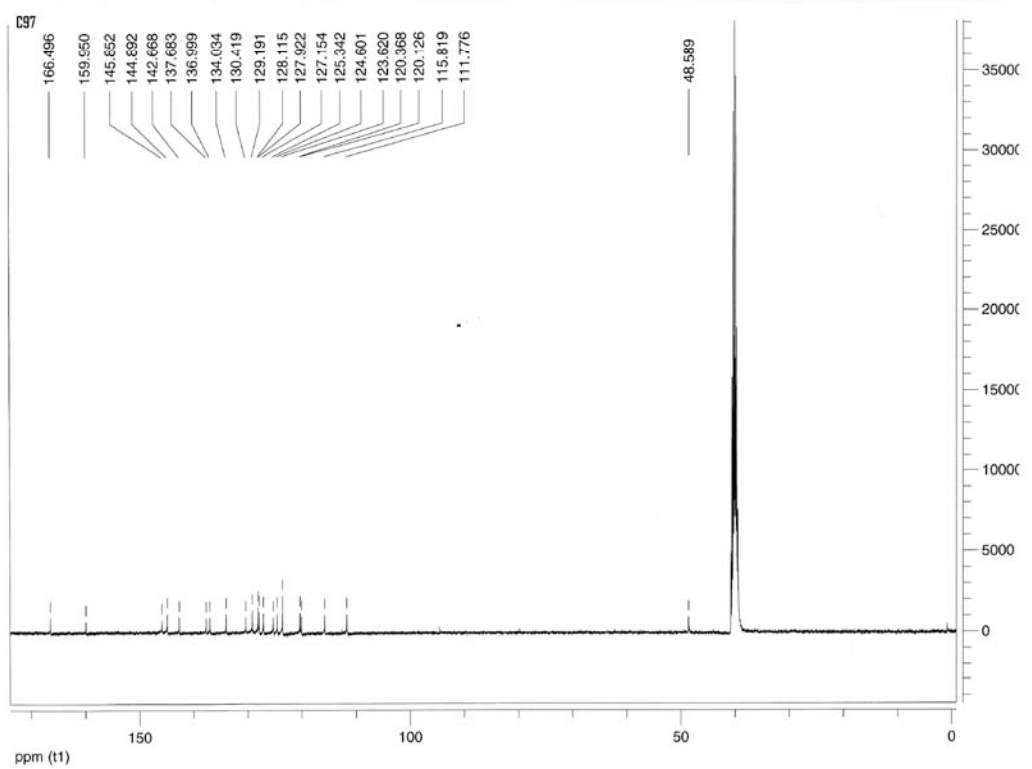



**HPLC Chromatograms. Method: Acetonitrile/ water (1:9)**

C10

```

=====
Acq. Operator   : Joydev-shiva                      Seq. Line :    1
Acq. Instrument : Instrument 1                      Location  : Vial 41
Injection Date  : 10/23/2009 4:49:40 PM           Inj       :    1
                                                    Inj Volume: Inj prog

Sequence File   : C:\CHEM32\1\SEQUENCE\DEF_LC1.S
Method          : C:\CHEM32\1\METHODS\SB-C8-254NM.M
Last changed    : 4/4/2009 7:35:01 PM by Joydev
Method Info     : injector program
=====

```

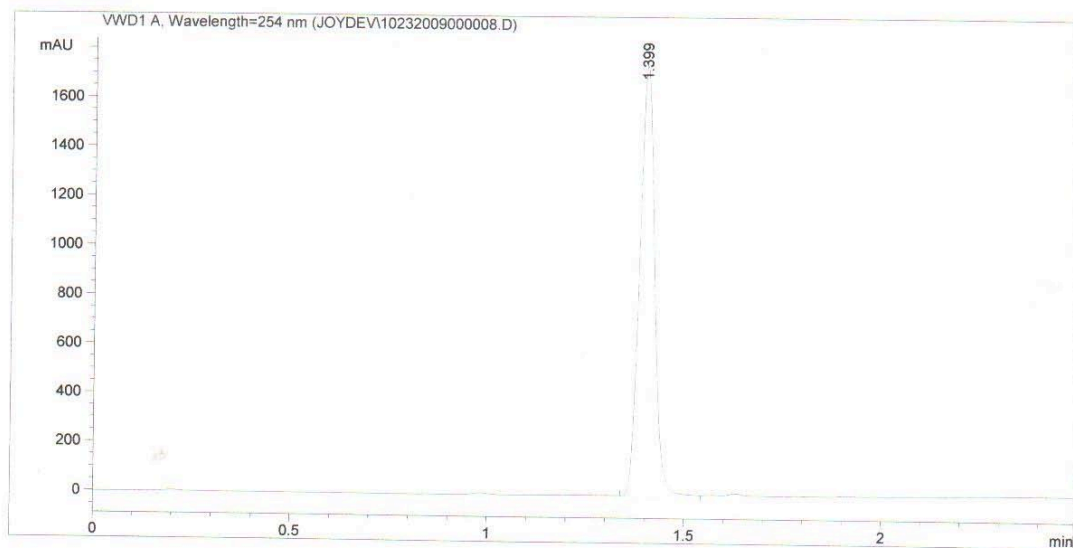

```

=====
                          Area Percent Report
=====

```

```

Sorted By      :      Signal
Multiplier     :      1.0000
Dilution       :      1.0000
Use Multiplier & Dilution Factor with ISTDs

```

Signal 1: VWD1 A, Wavelength=254 nm

| Peak # | RetTime [min] | Type | Width [min] | Area mAU *s | Height [mAU] | Area %   |
|--------|---------------|------|-------------|-------------|--------------|----------|
| 1      | 1.399         | VV   | 0.0409      | 4627.63037  | 1757.30823   | 100.0000 |

```
Totals :                      4627.63037 1757.30823
```

```

=====
*** End of Report ***
=====

```

C14

```

=====
Acq. Operator   : Joydev                      Seq. Line :    1
Acq. Instrument : Instrument 1                Location  : Vial 21
Injection Date  : 5/8/2008 3:06:04 PM        Inj       :    1
                                           Inj Volume: Inj prog

Sequence File   : C:\CHEM32\1\SEQUENCE\DEF_LC1.S
Method          : C:\Chem32\1\METHODS\SB-C8-254NM.M
Last changed    : 1/28/2008 2:54:39 PM by lqiao
Method Info     : injector program
    
```

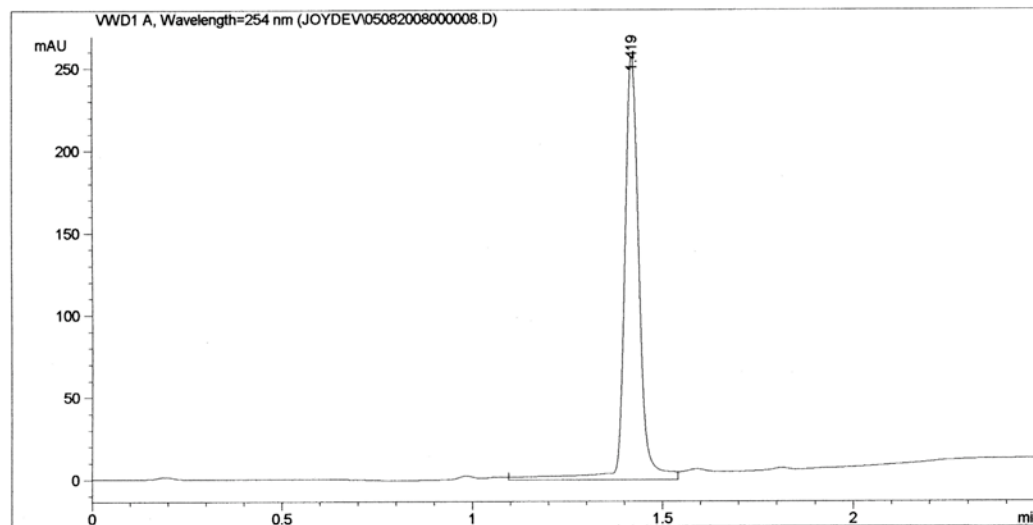

=====  
 Area Percent Report  
 =====

```

Sorted By      :      Signal
Multiplier     :      1.0000
Dilution       :      1.0000
Use Multiplier & Dilution Factor with ISTDs
    
```

Signal 1: VWD1 A, Wavelength=254 nm

| Peak # | RetTime [min] | Type | Width [min] | Area mAU *s | Height [mAU] | Area %   |
|--------|---------------|------|-------------|-------------|--------------|----------|
| 1      | 1.419         | VV   | 0.0403      | 702.65326   | 259.75424    | 100.0000 |

Totals :                      702.65326 259.75424

=====  
 \*\*\* End of Report \*\*\*

C61

```

=====
Acq. Operator   : Joydev-shiva           Seq. Line :    2
Acq. Instrument : Instrument 1           Location  : Vial 42
Injection Date  : 10/23/2009 4:54:12 PM Inj       :    1
                                           Inj Volume: Inj prog
Sequence File   : C:\CHEM32\1\SEQUENCE\DEF LC1.S
Method          : C:\CHEM32\1\METHODS\SB-C8-254NM.M
Last changed    : 4/4/2009 7:35:01 PM by Joydev
Method Info     : injector program
=====
    
```

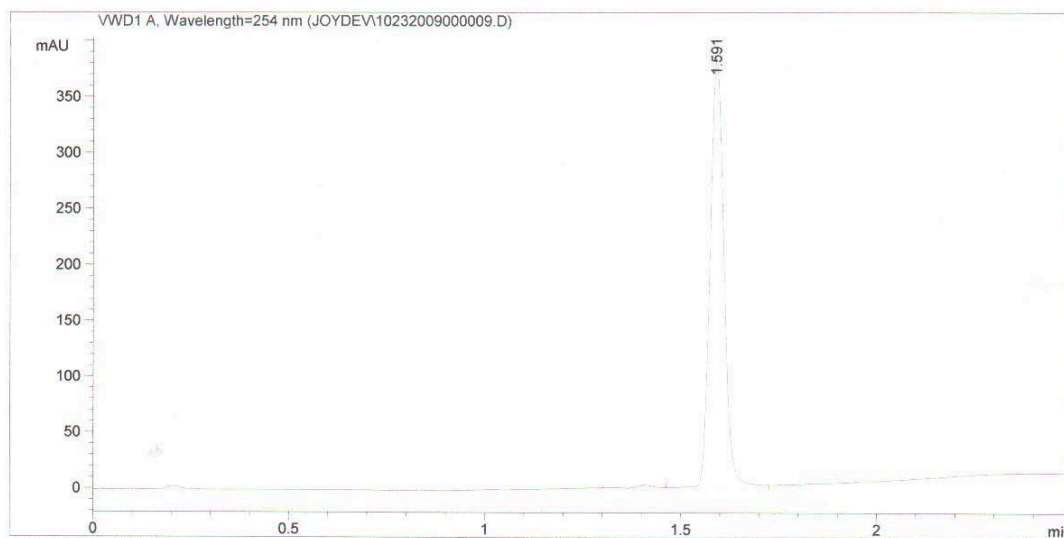

=====  
 Area Percent Report  
 =====

```

Sorted By      : Signal
Multiplier     : 1.0000
Dilution       : 1.0000
Use Multiplier & Dilution Factor with ISTDs
    
```

Signal 1: VWD1 A, Wavelength=254 nm

| Peak # | RetTime [min] | Type | Width [min] | Area mAU  | Area *s | Height [mAU] | Area %   |
|--------|---------------|------|-------------|-----------|---------|--------------|----------|
| 1      | 1.591         | VV   | 0.0403      | 998.38293 |         | 386.41644    | 100.0000 |

Totals :                      998.38293   386.41644

=====  
 \*\*\* End of Report \*\*\*

C64

```

=====
Acq. Operator   : Joydev-shiva                Seq. Line :    1
Acq. Instrument : Instrument 1                Location  : Vial 41
Injection Date  : 10/23/2009 5:33:46 PM      Inj       :    1
                                           Inj Volume: Inj prog

Sequence File   : C:\CHEM32\1\SEQUENCE\DEF_LC1.S
Method          : C:\CHEM32\1\METHODS\SB-C8-254NM.M
Last changed    : 4/4/2009 7:35:01 PM by Joydev
Method Info     : injector program
=====

```

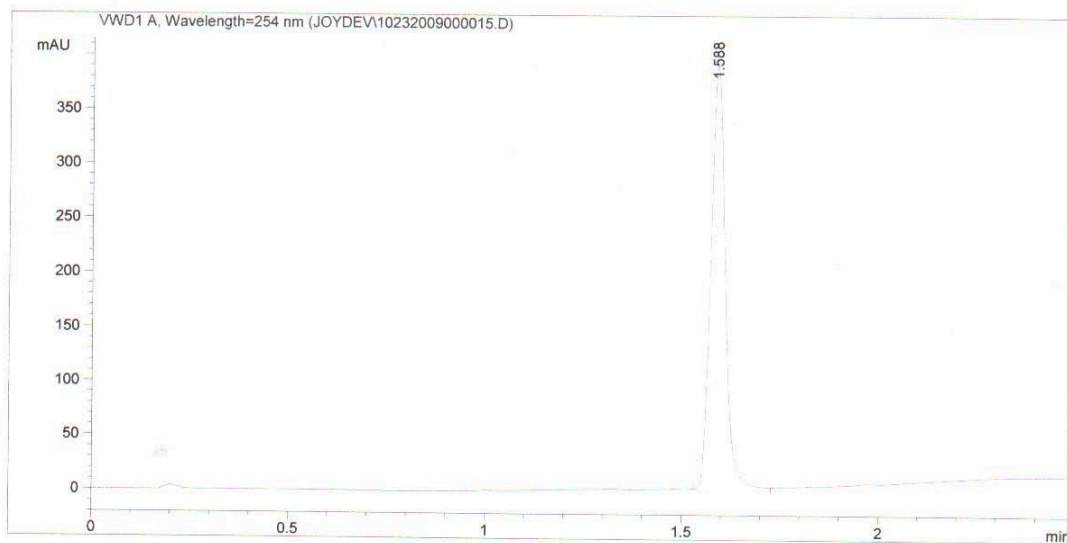

```

=====
                          Area Percent Report
=====

```

```

Sorted By           :      Signal
Multiplier          :      1.0000
Dilution            :      1.0000
Use Multiplier & Dilution Factor with ISTDs

```

Signal 1: VWD1 A, Wavelength=254 nm

| Peak # | RetTime [min] | Type | Width [min] | Area mAU *s | Height [mAU] | Area %   |
|--------|---------------|------|-------------|-------------|--------------|----------|
| 1      | 1.588         | VV   | 0.0406      | 1032.09961  | 395.72729    | 100.0000 |

```
Totals :                1032.09961  395.72729
```

```

=====
*** End of Report ***
=====

```

C84

```

=====
Acq. Operator   : Joydev-shiva           Seq. Line :    1
Acq. Instrument : Instrument 1           Location  : Vial 41
Injection Date  : 11/14/2009 4:14:22 PM Inj       :    1
                                           Inj Volume: Inj prog
Sequence File   : C:\CHEM32\1\SEQUENCE\DEF_LC1.S
Method          : C:\CHEM32\1\METHODS\SB-C8-254NM.M
Last changed    : 4/4/2009 7:35:01 PM by Joydev
Method Info     : injector program
=====
    
```

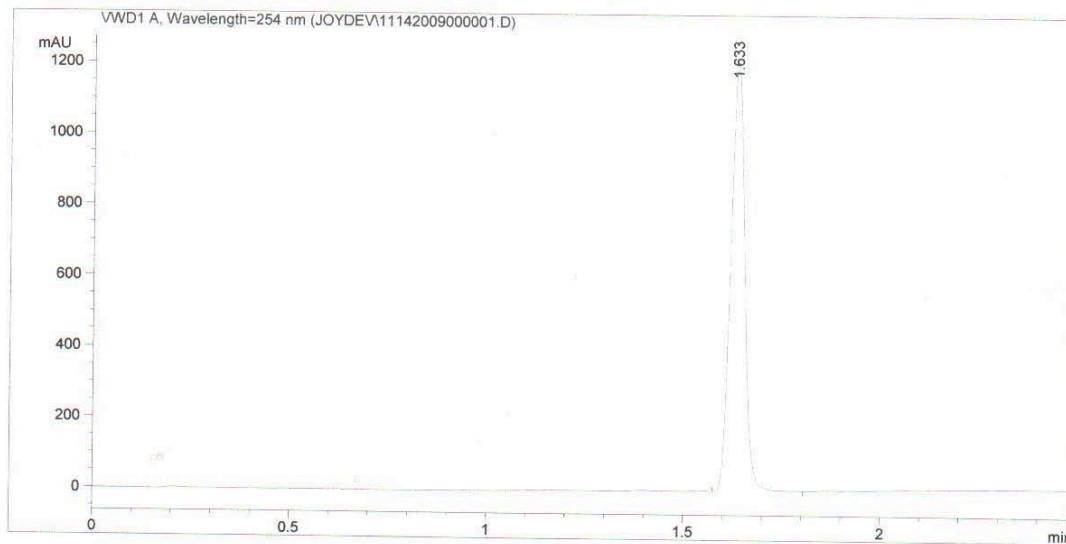

=====  
Area Percent Report  
=====

```

Sorted By      :      Signal
Multiplier     :      1.0000
Dilution       :      1.0000
Use Multiplier & Dilution Factor with ISTDs
    
```

Signal 1: VWD1 A, Wavelength=254 nm

| Peak # | RetTime [min] | Type | Width [min] | Area mAU *s | Height [mAU] | Area %   |
|--------|---------------|------|-------------|-------------|--------------|----------|
| 1      | 1.633         | VV   | 0.0380      | 3077.17993  | 1225.28430   | 100.0000 |

Totals :                    3077.17993 1225.28430

=====  
\*\*\* End of Report \*\*\*

C90

```

=====
Acq. Operator   : Joydev-shiva           Seq. Line :    2
Acq. Instrument : Instrument 1           Location  : Vial 42
Injection Date  : 11/14/2009 4:18:53 PM Inj       :    1
                                           Inj Volume: Inj prog

Sequence File   : C:\CHEM32\1\SEQUENCE\DEF LC1.S
Method          : C:\CHEM32\1\METHODS\SB-C8-254NM.M
Last changed    : 4/4/2009 7:35:01 PM by Joydev
Method Info     : injector program
=====
    
```

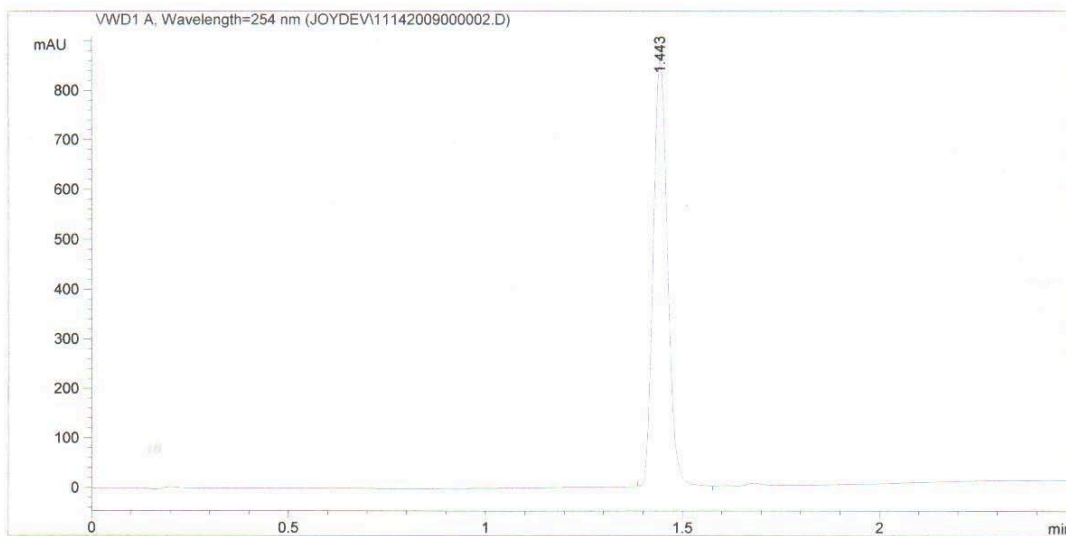

=====  
Area Percent Report  
=====

```

Sorted By      :      Signal
Multiplier     :      1.0000
Dilution       :      1.0000
Use Multiplier & Dilution Factor with ISTDs
    
```

Signal 1: VWD1 A, Wavelength=254 nm

| Peak # | RetTime [min] | Type | Width [min] | Area mAU *s | Height [mAU] | Area %   |
|--------|---------------|------|-------------|-------------|--------------|----------|
| 1      | 1.443         | VV   | 0.0400      | 2224.03418  | 869.30493    | 100.0000 |

Totals :                    2224.03418   869.30493

C97

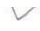

```

=====
/ Acq. Operator   : Joydev-Suresh           Seq. Line :    3
  Acq. Instrument : Instrument 1            Location  : Vial 43
  Injection Date  : 11/6/2009 10:42:28 AM  Inj       :    1
                                           Inj Volume: Inj prog

Sequence File   : C:\CHEM32\1\SEQUENCE\DEF_LC1.S
Method          : C:\CHEM32\1\METHODS\SB-C8-254NM.M
Last changed    : 4/4/2009 7:35:01 PM by Joydev
Method Info     : injector program
=====
    
```

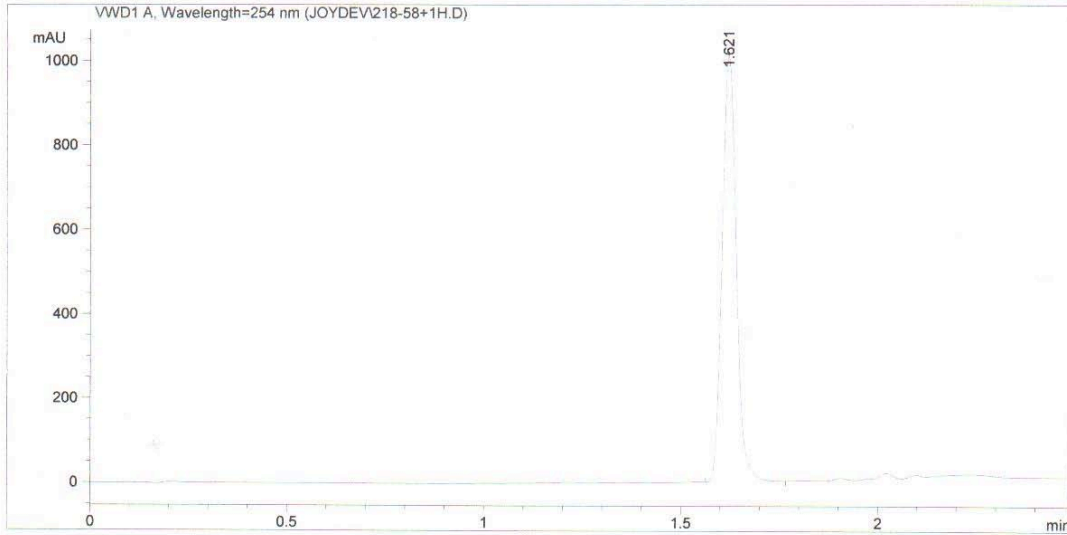

Area Percent Report

```

=====
Sorted By      :      Signal
Multiplier     :      1.0000
Dilution      :      1.0000
Use Multiplier & Dilution Factor with ISTDs
    
```

Signal 1: VWD1 A, Wavelength=254 nm

| Peak # | RetTime [min] | Type | Width [min] | Area mAU*s | Height [mAU] | Area %   |
|--------|---------------|------|-------------|------------|--------------|----------|
| 1      | 1.621         | VV   | 0.0392      | 2527.57642 | 1018.20734   | 100.0000 |

Totals :                    2527.57642 1018.20734

\*\*\* End of Report \*\*\*

**HPLC Chromatograms. Method: methanol/ water (1:9)**

**C10**

```

=====
Acq. Operator   : Joydev-shiva           Seq. Line : 1
Acq. Instrument : Instrument 1           Location  : Vial 41
Injection Date  : 10/23/2009 6:02:11 PM Inj       : 1
                                           Inj Volume: 5 µl
Sequence File   : C:\CHEM32\1\SEQUENCE\DEF_LC1.S
Method          : C:\CHEM32\1\METHODS\MALIK90WATER10MEOH.M
Last changed    : 4/23/2009 1:18:40 PM by Malik
=====
    
```

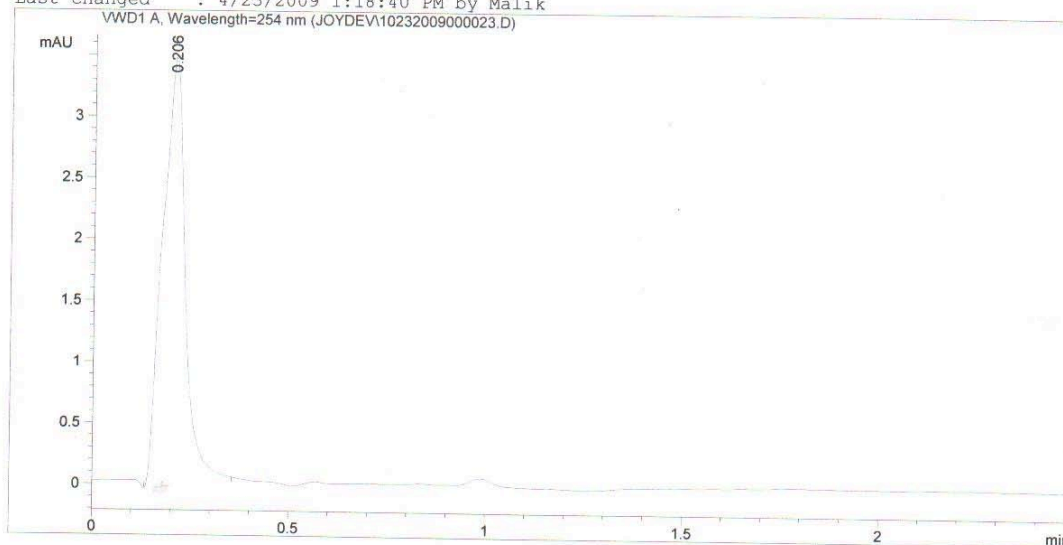

=====  
**Area Percent Report**  
 =====

```

Sorted By      : Signal
Multiplier     : 1.0000
Dilution       : 1.0000
Use Multiplier & Dilution Factor with ISTDs
    
```

Signal 1: VWD1 A, Wavelength=254 nm

| Peak # | RetTime [min] | Type | Width [min] | Area mAU *s | Height [mAU] | Area %   |
|--------|---------------|------|-------------|-------------|--------------|----------|
| 1      | 0.206         | BB   | 0.0574      | 14.19989    | 3.51214      | 100.0000 |

Totals :                      14.19989      3.51214

=====  
 \*\*\* End of Report \*\*\*



C61

```

=====
Acq. Operator   : Joydev-shiva           Seq. Line :    2
Acq. Instrument : Instrument 1           Location  : Vial 42
Injection Date  : 10/23/2009 6:05:46 PM Inj       :    1
                                           Inj Volume: 5 µl

Sequence File   : C:\CHEM32\1\SEQUENCE\DEF LC1.S
Method          : C:\CHEM32\1\METHODS\MALIK90WATER10MEOH.M
Last changed    : 4/23/2009 1:18:40 PM by Malik
=====
    
```

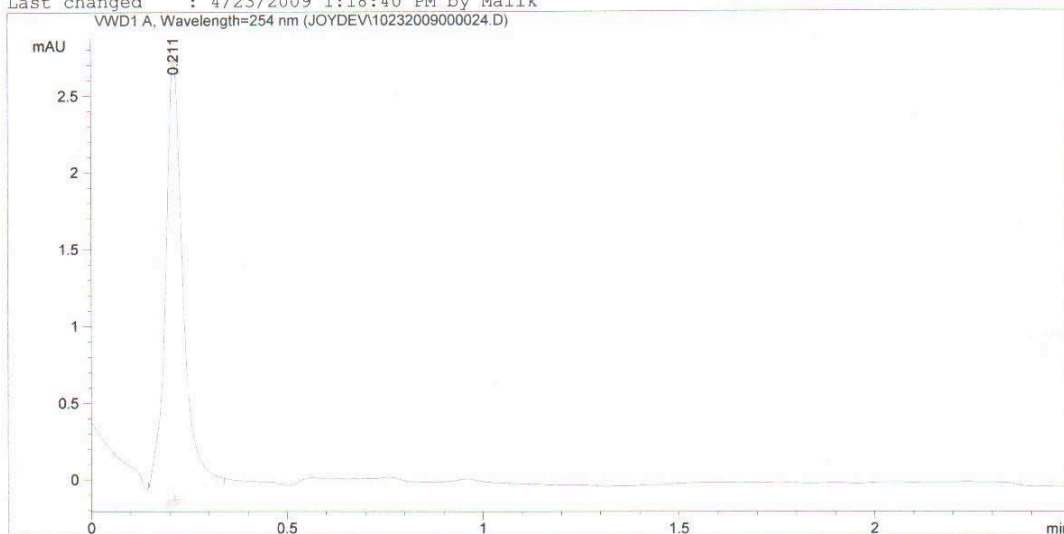

=====  
 Area Percent Report  
 =====

```

Sorted By       :      Signal
Multiplier      :      1.0000
Dilution        :      1.0000
Use Multiplier & Dilution Factor with ISTDs
    
```

Signal 1: VWD1 A, Wavelength=254 nm

| Peak # | RetTime [min] | Type | Width [min] | Area mAU *s | Height [mAU] | Area %   |
|--------|---------------|------|-------------|-------------|--------------|----------|
| 1      | 0.211         | BB   | 0.0448      | 8.70308     | 2.81324      | 100.0000 |

```
Totals :                      8.70308    2.81324
```

=====  
 \*\*\* End of Report \*\*\*

C64

```
=====
Acq. Operator   : Joydev-shiva           Seq. Line :    1
Acq. Instrument : Instrument 1           Location  : Vial 41
Injection Date  : 10/23/2009 6:27:46 PM Inj       :    1
                                           Inj Volume: 5 µl
Sequence File   : C:\CHEM32\1\SEQUENCE\DEF_LC1.S
Method          : C:\CHEM32\1\METHODS\MALIK90WATER10MEOH.M
Last changed    : 4/23/2009 1:18:40 PM by Malik
=====
```

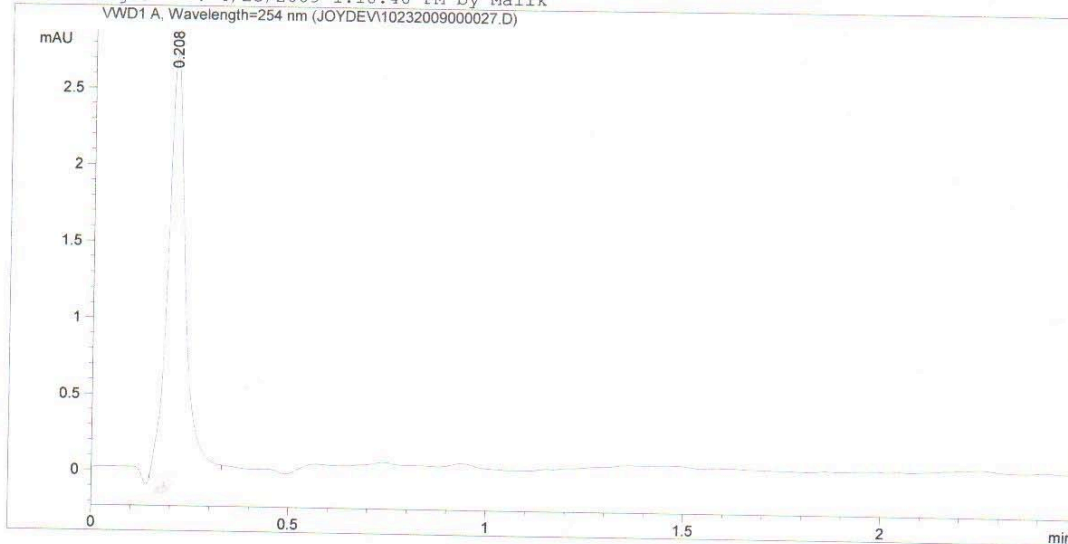

=====  
Area Percent Report  
=====

```
Sorted By      :      Signal
Multiplier     :      1.0000
Dilution       :      1.0000
Use Multiplier & Dilution Factor with ISTDs
```

Signal 1: VWD1 A, Wavelength=254 nm

| Peak # | RetTime [min] | Type | Width [min] | Area mAU *s | Height [mAU] | Area %   |
|--------|---------------|------|-------------|-------------|--------------|----------|
| 1      | 0.208         | BB   | 0.0461      | 8.54374     | 2.77505      | 100.0000 |

```
Totals :                8.54374    2.77505
```

=====  
\*\*\* End of Report \*\*\*

C86

```

=====
Acq. Operator   : Joydev-shiva           Seq. Line :    2
Acq. Instrument : Instrument 1           Location  : Vial 42
Injection Date  : 10/23/2009 6:31:23 PM Inj       :    1
                                           Inj Volume: 5 µl
Sequence File   : C:\CHEM32\1\SEQUENCE\DEF LC1.S
Method          : C:\CHEM32\1\METHODS\MALIK90WATER10MEOH.M
Last changed    : 4/23/2009 1:18:40 PM by Malik
=====

```

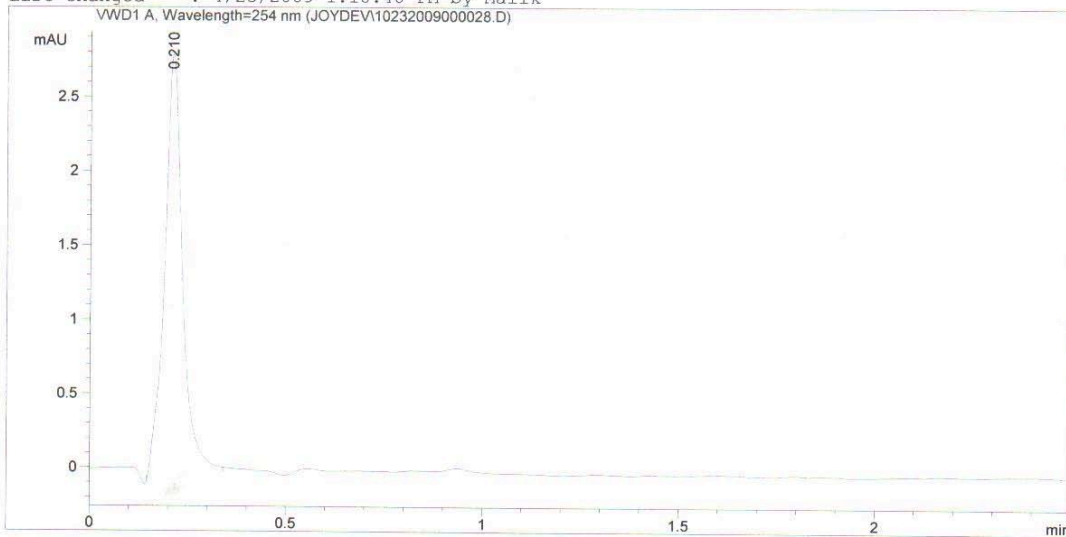

```

=====
                          Area Percent Report
=====

```

```

Sorted By      :      Signal
Multiplier     :      1.0000
Dilution       :      1.0000
Use Multiplier & Dilution Factor with ISTDs

```

Signal 1: VWD1 A, Wavelength=254 nm

| Peak # | RetTime [min] | Type | Width [min] | Area mAU | Area *s | Height [mAU] | Area %   |
|--------|---------------|------|-------------|----------|---------|--------------|----------|
| 1      | 0.210         | BB   | 0.0464      | 9.28219  |         | 2.87325      | 100.0000 |

```
Totals :                9.28219    2.87325
```

```

=====
*** End of Report ***
=====

```

C97

```

=====
Acq. Operator   : Joydev-shiva                      Seq. Line :    4
Acq. Instrument : Instrument 1                      Location  : Vial 44
Injection Date  : 10/23/2009 6:12:58 PM           Inj       :    1
                                                    Inj Volume: 5 µl
Sequence File   : C:\CHEM32\1\SEQUENCE\DEF_LC1.S
Method          : C:\CHEM32\1\METHODS\MALIK90WATER10MEOH.M
Last changed    : 4/23/2009 1:18:40 PM by Malik
=====

```

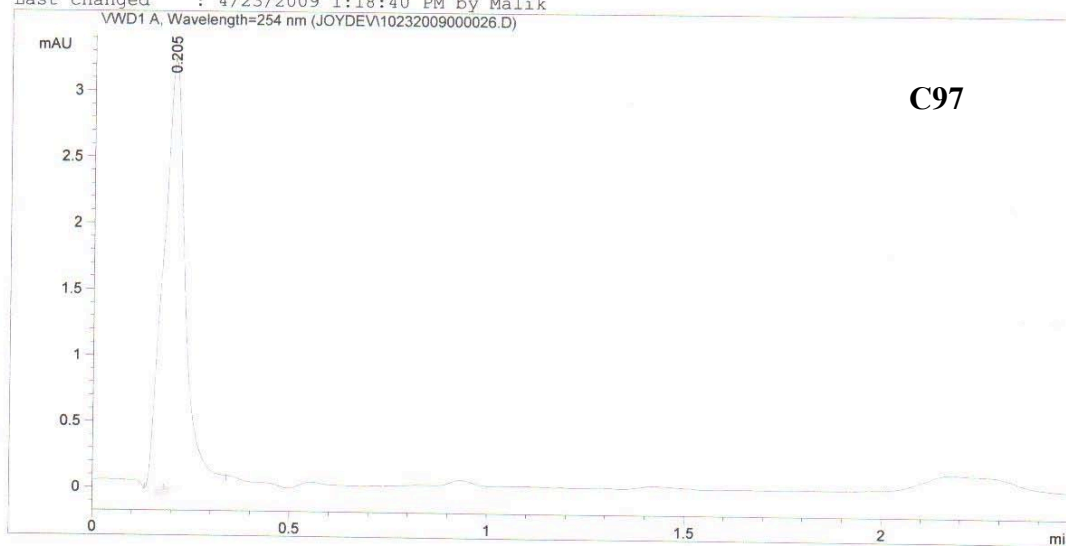

```

=====
                          Area Percent Report
=====

```

```

Sorted By      :      Signal
Multiplier     :      1.0000
Dilution      :      1.0000
Use Multiplier & Dilution Factor with ISTDs

```

Signal 1: VWD1 A, Wavelength=254 nm

| Peak # | RetTime [min] | Type | Width [min] | Area mAU | Height [mAU] | Area %   |
|--------|---------------|------|-------------|----------|--------------|----------|
| 1      | 0.205         | BB   | 0.0531      | 12.34572 | 3.24812      | 100.0000 |

```
Totals :                12.34572    3.24812
```

```

=====
*** End of Report ***
=====

```
